# Supplementary material
Source: publisher site journal article supplement (https://www.dovepress.com/get_supplementary_file.php?f=207823.xlsx)
Supplement: Supplementary file 1 [file get_supplementary_file.php]

## Sheet: Table S1
Table S1 Active Herbal Ingredients in Epimedium
Molecule Name	OB(%)	DL
24-epicampesterol	37.58	0.71
poriferast-5-en-3beta-ol	36.91	0.75
DFV	32.76	0.18
Chryseriol	35.85	0.27
8-Isopentenyl-kaempferol	38.04	0.39
sitosterol	36.91	0.75
kaempferol	41.88	0.24
olivil	62.23	0.41
Anhydroicaritin	45.41	0.44
Yinyanghuo A	56.96	0.77
Yinyanghuo C	45.67	0.5
Yinyanghuo E	51.63	0.55
8-(3-methylbut-2-enyl)-2-phenyl-chromone	48.54	0.25
1,2-bis(4-hydroxy-3-methoxyphenyl)propan-1,3-diol	52.31	0.22
Icariin	41.58	0.61
Icariside A7	31.91	0.86
luteolin	36.16	0.25
Magnograndiolide	63.71	0.19
quercetin	46.43	0.28

## Sheet: Table S2
Table S2 Ingredients in Epimedium and corresponding targets
Molecule Name	Pubchem CID	Protein name	Symbol Name	Uniprot
24-epicampesterol	5283637	Thyroid hormone receptor beta	THRB	P10828
		Amine oxidase [flavin-containing] B	AOFB	P27338
		Bone morphogenetic protein 2	BMP2	P12643
		MAP kinase-activated protein kinase 2	MAPKAPK2	P49137
		Aldo-keto reductase family 1 member C2	AK1C2	P52895
		Caspase-7	CASP7	P55210
		Steryl-sulfatase	STS	P08842
		Proto-oncogene serine/threonine-protein kinase Pim-1	PIM1	P11309
		Serum albumin	ALBU	P02768
		Nuclear receptor ROR-alpha	RORA	P35398
		Apolipoprotein A-II	APOA2	P02652
		Carbonic anhydrase 2	CAH2	P00918
		Kinesin-like protein KIF11	KIF11	P52732
		Vitamin D-binding protein	VTDB	P02774
		Progesterone receptor	PRGR	P06401
		Mitogen-activated protein kinase 1	MK01	P28482
		Mineralocorticoid receptor	MCR	P08235
		Estradiol 17-beta-dehydrogenase 1	HSD17B1	P14061
poriferast-5-en-3beta-ol	457801	Aldo-keto reductase family 1 member C2	AK1C2	P52895
		Steryl-sulfatase	STS	P08842
		Bone morphogenetic protein 2	BMP2	P12643
		Proto-oncogene serine/threonine-protein kinase Pim-1	PIM1	P11309
		MAP kinase-activated protein kinase 2	MAPKAPK2	P49137
		Nuclear receptor ROR-alpha	RORA	P35398
		Amine oxidase [flavin-containing] B	AOFB	P27338
		Apolipoprotein A-II	APOA2	P02652
		Kinesin-like protein KIF11	KIF11	P52732
		Carbonic anhydrase 2	CAH2	P00918
		Serum albumin	ALBU	P02768
		Thyroid hormone receptor beta	THRB	P10828
		Mitogen-activated protein kinase 1	MK01	P28482
		Caspase-7	CASP7	P55210
		Progesterone receptor	PRGR	P06401
		Vitamin D-binding protein	VTDB	P02774
		Mineralocorticoid receptor	MCR	P08235
		Estradiol 17-beta-dehydrogenase 1	HSD17B1	P14061
DFV	114829	Estrogen receptor	ESR1	P03372
		Cell division protein kinase 2	CDK2	P24941
		Prothrombin	THRB	P10828
		Progesterone receptor	PRGR	P06401
		Proto-oncogene serine/threonine-protein kinase Pim-1	PIM1	P11309
		Androgen receptor	ANDR	P10275
Chryseriol	5280666	Carbonic anhydrase 2	CAH2	P00918
		Cytochrome P450 19A1	CYP19A1	P11511
		Androgen receptor	ANDR	P10275
		Tyrosine-protein kinase HCK	HCK	P08631
		Prothrombin	THRB	P10828
		Carbonic anhydrase 1	CAH1	P00915
		Estrogen receptor	ESR1	P03372
		Cholinesterase	CHLE	P06276
		Cell division protein kinase 2	CDK2	P24941
		Purine nucleoside phosphorylase	PNPH	P00491
		Glutathione S-transferase P	GSTP1	P09211
		Estradiol 17-beta-dehydrogenase 11	DHB11	Q8NBQ5
		Progesterone receptor	PRGR	P06401
		Proto-oncogene serine/threonine-protein kinase Pim-1	PIM1	P11309
		Glutathione reductase, mitochondrial	GSR	P00390
		Transthyretin	TTHY	P02766
		Phosphatidylinositol-4,5-bisphosphate 3-kinase catalytic subunit gamma isoform	PK3CG	P48736
		Glucosylceramidase	GLCM	P04062
8-Isopentenyl-kaempferol	5318624	Beta-secretase 1	BACE1	P56817
		Androgen receptor	ANDR	P10275
		Serine/threonine-protein kinase Chk1	CHK1	O14757
		Carbonic anhydrase 2	CAH2	P00918
		Tyrosine-protein kinase HCK	HCK	P08631
		Kinesin-like protein KIF11	KIF11	P52732
		Cytochrome P450 19A1	CYP19A1	P11511
		Aldo-keto reductase family 1 member C2	AK1C2	P52895
		Caspase-7	CASP7	P55210
		Mitogen-activated protein kinase 14	MAPK14	Q16539
		Estrogen receptor	ESR1	P03372
		Stromelysin-1	MMP3	P08254
		Collagenase 3	MMP13	P45452
		Progesterone receptor	PRGR	P06401
		Transthyretin	TTHY	P02766
		Cholinesterase	CHLE	P06276
		Steryl-sulfatase	STS	P08842
		Peptidyl-prolyl cis-trans isomerase A	PPIA	P62937
		Complement factor B	CFAB	P00751
		Glutathione S-transferase P	GSTP1	P09211
		Prothrombin	THRB	P10828
		Proto-oncogene serine/threonine-protein kinase Pim-1	PIM1	P11309
		Apolipoprotein A-II	APOA2	P02652
		Mitogen-activated protein kinase 10	MK10	P53779
		Bone morphogenetic protein 2	BMP2	P12643
		Peptidyl-prolyl cis-trans isomerase FKBP1A	FKB1A	P62942
		Ephrin type-B receptor 4	EPHB4	P54760
		Epidermal growth factor receptor	EGFR	P00533
		Mitogen-activated protein kinase 8	MK08	P45983
		Cyclin-A2	CCNA2	P20248
		Serum albumin	ALBU	P02768
		Vascular endothelial growth factor receptor 2	KDR	P35968
		Cell division protein kinase 6	CDK6	Q00534
sitosterol	12303645	Aldo-keto reductase family 1 member C2	AK1C2	P52895
		Bone morphogenetic protein 2	BMP2	P12643
		Amine oxidase [flavin-containing] B	AOFB	P27338
		Serum albumin	ALBU	P02768
		Apolipoprotein A-II	APOA2	P02652
		Steryl-sulfatase	STS	P08842
		MAP kinase-activated protein kinase 2	MAPKAPK2	P49137
		Thyroid hormone receptor beta	THRB	P10828
		Proto-oncogene serine/threonine-protein kinase Pim-1	PIM1	P11309
		Caspase-7	CASP7	P55210
		Collagenase 3	MMP13	P45452
		Androgen receptor	ANDR	P10275
		Carbonic anhydrase 2	CAH2	P00918
		Kinesin-like protein KIF11	KIF11	P52732
		Nuclear receptor ROR-alpha	RORA	P35398
		Progesterone receptor	PRGR	P06401
		Mitogen-activated protein kinase 1	MK01	P28482
kaempferol	5280863	Carbonic anhydrase 2	CAH2	P00918
		Tyrosine-protein kinase HCK	HCK	P08631
		Estrogen receptor	ESR1	P03372
		Cholinesterase	CHLE	P06276
		Prothrombin	THRB	P10828
		Proto-oncogene serine/threonine-protein kinase Pim-1	PIM1	P11309
		Cell division protein kinase 6	CDK6	Q00534
		Peptidyl-prolyl cis-trans isomerase A	PPIA	P62937
		Epidermal growth factor receptor	EGFR	P00533
olivil	129317076	Carbonic anhydrase 1	CAH1	P00915
		Glucosylceramidase	GLCM	P04062
		Triggering receptor expressed on myeloid cells 1	TREM1	Q9NP99
		Oxysterols receptor LXR-beta	NR1H2	P55055
		Serine/threonine-protein kinase Chk1	CHK1	O14757
		Carbonic anhydrase 2	CAH2	P00918
		Mitogen-activated protein kinase 10	MK10	P53779
		Proto-oncogene serine/threonine-protein kinase Pim-1	PIM1	P11309
		Prothrombin	THRB	P10828
		Estrogen receptor beta	ESR2	Q92731
		TGF-beta receptor type-2	TGFR2	P37173
		Glutaminyl-peptide cyclotransferase	QPCT	Q16769
		Estrogen receptor	ESR1	P03372
Anhydroicaritin	5318980	Beta-secretase 1	BACE1	P56817
		Serine/threonine-protein kinase Chk1	CHK1	O14757
		Tyrosine-protein kinase HCK	HCK	P08631
		Carbonic anhydrase 2	CAH2	P00918
		Kinesin-like protein KIF11	KIF11	P52732
		Androgen receptor	ANDR	P10275
		Transthyretin	TTHY	P02766
		Complement factor B	CFAB	P00751
		Estrogen receptor	ESR1	P03372
		Mitogen-activated protein kinase 14	MAPK14	Q16539
		Caspase-7	CASP7	P55210
		Proto-oncogene serine/threonine-protein kinase Pim-1	PIM1	P11309
		Progesterone receptor	PRGR	P06401
		Cholinesterase	CHLE	P06276
		Peptidyl-prolyl cis-trans isomerase FKBP1A	FKB1A	P62942
		Steryl-sulfatase	STS	P08842
		Ephrin type-B receptor 4	EPHB4	P54760
		Peptidyl-prolyl cis-trans isomerase A	PPIA	P62937
		Glutathione S-transferase P	GSTP1	P09211
		Apolipoprotein A-II	APOA2	P02652
		Mitogen-activated protein kinase 10	MK10	P53779
		Prothrombin	THRB	P10828
		Bone morphogenetic protein 2	BMP2	P12643
		Cyclin-A2	CCNA2	P20248
		Epidermal growth factor receptor	EGFR	P00533
		Mitogen-activated protein kinase 8	MK08	P45983
		Cell division protein kinase 6	CDK6	Q00534
		Serum albumin	ALBU	P02768
		Mitogen-activated protein kinase 1	MK01	P28482
		Cytochrome P450 19A1	CYP19A1	P11511
		Collagenase 3	MMP13	P45452
Yinyanghuo A	5315393	Beta-secretase 1	BACE1	P56817
		Estradiol 17-beta-dehydrogenase 11	DHB11	Q8NBQ5
		Tyrosine-protein kinase HCK	HCK	P08631
		Ephrin type-B receptor 4	EPHB4	P54760
		Carbonic anhydrase 2	CAH2	P00918
		cGMP-specific 3,5-cyclic phosphodiesterase	PDE5A	O76074
		Thyroid hormone receptor beta	THRB	P10828
		Aldo-keto reductase family 1 member C2	AK1C2	P52895
		Aldose reductase	ALDR	P15121
		Kinesin-like protein KIF11	KIF11	P52732
		Amine oxidase [flavin-containing] B	AOFB	P27338
		Transthyretin	TTHY	P02766
		Proto-oncogene serine/threonine-protein kinase Pim-1	PIM1	P11309
		Carbonic anhydrase 1	CAH1	P00915
		Mitogen-activated protein kinase 1	MK01	P28482
		Cholinesterase	CHLE	P06276
		Cell division protein kinase 2	CDK2	P24941
		Triggering receptor expressed on myeloid cells 1	TREM1	Q9NP99
		Caspase-3	CASP3	P42574
		Vascular endothelial growth factor receptor 2	KDR	P35968
		Methionine aminopeptidase 1	AMPM1	P53582
		MAP kinase-activated protein kinase 2	MAPKAPK2	P49137
		TGF-beta receptor type-1	TGFR1	Q64729
		Collagenase 3	MMP13	P45452
		Ribosyldihydronicotinamide dehydrogenase [quinone]	NQO2	P16083
		Phosphatidylinositol-4,5-bisphosphate 3-kinase catalytic subunit gamma isoform	PK3CG	P48736
		Androgen receptor	ANDR	P10275
		Caspase-7	CASP7	P55210
		Mitogen-activated protein kinase 14	MAPK14	Q16539
		Progesterone receptor	PRGR	P06401
		Liver carboxylesterase 1	EST1	P23141
		Purine nucleoside phosphorylase	PNPH	P00491
		ADAM 17	ADA17	P78536
		Peptidyl-prolyl cis-trans isomerase A	PPIA	P62937
		Mitogen-activated protein kinase 8	MK08	P45983
		Cytochrome P450 19A1	CYP19A1	P11511
		Estrogen receptor	ESR1	P03372
		Bone morphogenetic protein 2	BMP2	P12643
		Aldo-keto reductase family 1 member C3	AK1C3	P42330
Yinyanghuo C	5315395	Tyrosine-protein kinase HCK	HCK	P08631
		Carbonic anhydrase 2	CAH2	P00918
		Caspase-7	CASP7	P55210
		Amine oxidase [flavin-containing] B	AOFB	P27338
		Carbonic anhydrase 1	CAH1	P00915
		Cholinesterase	CHLE	P06276
		Cell division protein kinase 2	CDK2	P24941
		Methionine aminopeptidase 1	AMPM1	P53582
		Proto-oncogene serine/threonine-protein kinase Pim-1	PIM1	P11309
		Phosphatidylinositol-4,5-bisphosphate 3-kinase catalytic subunit gamma isoform	PK3CG	P48736
		ADAM 17	ADA17	P78536
		Estrogen receptor	ESR1	P03372
		Androgen receptor	ANDR	P10275
		Cytochrome P450 19A1	CYP19A1	P11511
Yinyanghuo E	5315397	Carbonic anhydrase 2	CAH2	P00918
		Amine oxidase [flavin-containing] B	AOFB	P27338
		Tyrosine-protein kinase HCK	HCK	P08631
		Cytochrome P450 19A1	CYP19A1	P11511
		Caspase-7	CASP7	P55210
		Carbonic anhydrase 1	CAH1	P00915
		Estrogen receptor	ESR1	P03372
		Cholinesterase	CHLE	P06276
		Cell division protein kinase 2	CDK2	P24941
		Proto-oncogene serine/threonine-protein kinase Pim-1	PIM1	P11309
		Serum albumin	ALBU	P02768
		Methionine aminopeptidase 1	AMPM1	P53582
		Steryl-sulfatase	STS	P08842
		Estradiol 17-beta-dehydrogenase 11	DHB11	Q8NBQ5
		Beta-secretase 1	BACE1	P56817
		Androgen receptor	ANDR	P10275
		Seprase	SEPR	Q12884
		Apolipoprotein A-II	APOA2	P02652
		ADAM 17	ADA17	P78536
		Purine nucleoside phosphorylase	PNPH	P00491
		Glutathione S-transferase P	GSTP1	P09211
		Serine/threonine-protein kinase Chk1	CHK1	O14757
		Cyclin-A2	CCNA2	P20248
		Glutathione reductase, mitochondrial	GSR	P00390
8-(3-methylbut-2-enyl)-2-phenyl-chromone	17861868	Serine/threonine-protein kinase Chk1	CHK1	O14757
		Collagenase 3	MMP13	P45452
		Cytochrome P450 19A1	CYP19A1	P11511
		Thyroid hormone receptor beta	THRB	P10828
		Aldo-keto reductase family 1 member C2	AK1C2	P52895
		Steryl-sulfatase	STS	P08842
		Apolipoprotein A-II	APOA2	P02652
		Proto-oncogene serine/threonine-protein kinase Pim-1	PIM1	P11309
		MAP kinase-activated protein kinase 2	MAPKAPK2	P49137
		Kinesin-like protein KIF11	KIF11	P52732
		Serum albumin	ALBU	P02768
		Caspase-7	CASP7	P55210
		Estrogen receptor	ESR1	P03372
		Bone morphogenetic protein 2	BMP2	P12643
		Complement factor B	CFAB	P00751
		Stromelysin-1	MMP3	P08254
		Transthyretin	TTHY	P02766
		Mitogen-activated protein kinase 1	MK01	P28482
		Peptidyl-prolyl cis-trans isomerase A	PPIA	P62937
		Androgen receptor	ANDR	P10275
		Carbonic anhydrase 2	CAH2	P00918
		Ephrin type-B receptor 4	EPHB4	P54760
1,2-bis(4-hydroxy-3-methoxyphenyl)propan-1,3-diol	12468616	Cytochrome P450 19A1	CYP19A1	P11511
		Mitogen-activated protein kinase 10	MK10	P53779
		Androgen receptor	ANDR	P10275
		Glutathione S-transferase P	GSTP1	P09211
		Carbonic anhydrase 2	CAH2	P00918
		Epidermal growth factor receptor	EGFR	P00533
		Mitogen-activated protein kinase 8	MK08	P45983
		Serine/threonine-protein kinase Chk1	CHK1	O14757
		Prothrombin	THRB	P10828
		Triggering receptor expressed on myeloid cells 1	TREM1	Q9NP99
		Peptidyl-prolyl cis-trans isomerase A	PPIA	P62937
		Amine oxidase [flavin-containing] B	AOFB	P27338
		Carbonic anhydrase 1	CAH1	P00915
		Cell division protein kinase 2	CDK2	P24941
		Vascular endothelial growth factor receptor 2	KDR	P35968
		Estrogen receptor	ESR1	P03372
		Transthyretin	TTHY	P02766
		Glutaminyl-peptide cyclotransferase	QPCT	Q16769
		Progesterone receptor	PRGR	P06401
		Purine nucleoside phosphorylase	PNPH	P00491
		Oxysterols receptor LXR-beta	NR1H2	P55055
		Complement factor B	CFAB	P00751
		Reticulon-4 receptor	RTN4R	Q9BZR6
		Beta-secretase 1	BACE1	P56817
		Estrogen receptor beta	Esr2	Q62986
		Cyclin-A2	CCNA2	P20248
		Glutathione reductase, mitochondrial	GSR	P00390
		Glucosylceramidase	GLCM	P04062
		cAMP-specific 3,5-cyclic phosphodiesterase 4B	PDE4B	Q07343
		Cholinesterase	CHLE	P06276
		Heat shock protein HSP 90-alpha	HSP90AA1	P07900
		Estrogen-related receptor gamma	ESRRG	P62508
Icariin	5318997	Mitogen-activated protein kinase 10	MK10	P53779
		Thyroid hormone receptor beta	THRB	P10828
		Kinesin-like protein KIF11	KIF11	P52732
		Estradiol 17-beta-dehydrogenase 11	DHB11	Q8NBQ5
		Proto-oncogene serine/threonine-protein kinase Pim-1	PIM1	P11309
		Glucosylceramidase	GLCM	P04062
		Transthyretin	TTHY	P02766
		Cathepsin D	CATD	P07339
		Glutathione S-transferase P	GSTP1	P09211
		Seprase	SEPR	Q12884
		Serine/threonine-protein kinase Chk1	CHK1	O14757
		Steryl-sulfatase	STS	P08842
		Apolipoprotein A-II	APOA2	P02652
		Complement factor B	CFAB	P00751
		Carbonic anhydrase 1	CAH1	P00915
		Methionine aminopeptidase 1	AMPM1	P53582
		P-selectin	LYAM3	P16109
		Carbonic anhydrase 2	CAH2	P00918
		Alpha-amylase 1	AMY1A	P04745
		Ephrin type-B receptor 4	EPHB4	P54760
		Peptidyl-prolyl cis-trans isomerase A	PPIA	P62937
		Cell division protein kinase 2	CDK2	P24941
		Purine nucleoside phosphorylase	PNPH	P00491
		Serum albumin	ALBU	P02768
		ADP-ribose pyrophosphatase, mitochondrial	NUDT9	Q9BW91
		MAP kinase-activated protein kinase 2	MAPKAPK2	P49137
		Mitogen-activated protein kinase 8	MK08	P45983
		Urokinase-type plasminogen activator	UROK	P00749
		Mitogen-activated protein kinase 1	MK01	P28482
		TGF-beta receptor type-2	TGFR2	P37173
		Cholinesterase	CHLE	P06276
		Cathepsin S	CATS	Q9BSJ6
		cAMP-specific 3,5-cyclic phosphodiesterase 4B	PDE4B	Q07343
		Triggering receptor expressed on myeloid cells 1	TREM1	Q9NP99
		Cyclin-A2	CCNA2	P20248
		Epidermal growth factor receptor	EGFR	P00533
		Complement factor D	CFAD	P00746
		Mitogen-activated protein kinase 14	MAPK14	Q16539
		Beta-secretase 1	BACE1	P56817
		Peptidyl-prolyl cis-trans isomerase FKBP1A	FKB1A	P62942
		Progesterone receptor	PRGR	P06401
		Oxysterols receptor LXR-beta	NR1H2	P55055
		Carbonic anhydrase 12	CAH12	O43570
		Prothrombin	THRB	P10828
		Inositol monophosphatase	IMPA1	P29218
		Tyrosine-protein kinase HCK	HCK	P08631
Icariside A7	5318401	Glutathione S-transferase P	GSTP1	P09211
		Tyrosine-protein kinase HCK	HCK	P08631
		Seprase	SEPR	Q12884
		ADP-ribose pyrophosphatase, mitochondrial	NUDT9	Q9BW91
		Glucosylceramidase	GLCM	P04062
		Peptidyl-prolyl cis-trans isomerase A	PPIA	P62937
		Carbonic anhydrase 2	CA2	P00918
		Methionine aminopeptidase 1	AMPM1	P53582
		TGF-beta receptor type-2	TGFR2	P37173
		Serine/threonine-protein kinase Chk1	CHK1	O14757
		Cyclin-A2	CCNA2	P20248
		S-methyl-5-thioadenosine phosphorylase	MTAP	Q13126
		Probable ATP-dependent RNA helicase DDX6	DDX6	P26196
		Lanosterol synthase	ERG7	P48449
		Estrogen receptor	ESR1	P03372
		Estrogen receptor beta	ESR2	Q92731
		cAMP-specific 3,5-cyclic phosphodiesterase 4B	PDE4B	Q07343
		Estradiol 17-beta-dehydrogenase 11	DHB11	Q8NBQ5
		Carbonic anhydrase 1	CAH1	P00915
		Cathepsin L2	CATL2	O60911
		Epidermal growth factor receptor	EGFR	P00533
		Purine nucleoside phosphorylase	PNPH	P00491
		Inositol monophosphatase	IMPA1	P29218
		Cholinesterase	CHLE	P06276
		Chymase	CMA1	P23946
		Cathepsin S	CATS	Q9BSJ6
		Glutaminyl-peptide cyclotransferase	QPCT	Q16769
		Alpha-amylase 1	AMY1A	P04745
		Cathepsin D	CATD	P07339
		Caspase-3	CASP3	P42574
luteolin	5280445	Cytochrome P450 19A1	CYP19A1	P11511
		Carbonic anhydrase 2	CAH2	P00918
		Androgen receptor	ANDR	P10275
		Prothrombin	THRB	P10828
		Tyrosine-protein kinase HCK	HCK	P08631
		Carbonic anhydrase 1	CAH1	P00915
		Estrogen receptor	ESR1	P03372
		Cell division protein kinase 2	CDK2	P24941
		Cholinesterase	CHLE	P06276
		Progesterone receptor	PRGR	P06401
		Beta-secretase 1	BACE1	P56817
		Glutathione S-transferase P	GSTP1	P09211
		Purine nucleoside phosphorylase	PNPH	P00491
		Cyclin-A2	CCNA2	P20248
		Proto-oncogene serine/threonine-protein kinase Pim-1	PIM1	P11309
		Glutathione reductase, mitochondrial	GSR	P00390
		Phosphatidylinositol-4,5-bisphosphate 3-kinase catalytic subunit gamma isoform	PK3CG	P48736
Magnograndiolide	5319198	Peptidyl-prolyl cis-trans isomerase A	PPIA	P62937
quercetin	5280343	Carbonic anhydrase 2	CAH2	P00918
		Prothrombin	THRB	P10828
		Proto-oncogene serine/threonine-protein kinase Pim-1	PIM1	P11309
		Tyrosine-protein kinase HCK	HCK	P08631
		Estrogen receptor	ESR1	P03372
		Complement factor B	CFAB	P00751
		Cholinesterase	CHLE	P06276
		Progesterone receptor	PRGR	P06401
		Peptidyl-prolyl cis-trans isomerase A	PPIA	P62937
		Mitogen-activated protein kinase 10	MK10	P53779
		Epidermal growth factor receptor	EGFR	P00533
		Mitogen-activated protein kinase 8	MK08	P45983

## Sheet: Table S3
Table S3 POF targets
Protein Name	Gene Symbol	Uniprot
Synaptic functional regulator FMR1	FMR1	Q06787
estrogen receptor	ESR1	P03372
methylenetetrahydrofolate reductase	MTHFR	P42898
Vascular endothelial growth factor A	VEGFA	P15692
androgen receptor	AR	P10275
Adiponectin	ADIPOQ	Q15848
Steroidogenic factor 1	SF1	Q13285
Growth/differentiation factor 9	GDF9	O60383
DNA excision repair protein ERCC-6	ERCC6	Q03468
Stromal cell-derived factor 1	CXCL12	P48061
Cyclin-dependent kinase inhibitor 1B	CDKN1B	P46527
Vascular endothelial growth factor receptor 2	KDR	P35968
Aromatase	CYP19A1	P11511
Prelamin-A/C	LMNA	P02545
Collagen alpha-1(I) chain	COL1A1	P02452
Forkhead box protein O3	FOXO3	O43524
Endoplasmic reticulum chaperone BiP	HSPA5	P11021
Thymidylate synthase	TYMS	P04818
POU domain, class 5, transcription factor 1	POU5F1	Q01860
Anti-Muellerian hormone type-2 receptor	AMH	Q16671
Nibrin	NBN	O60934
Fanconi anemia group M protein	FANCM	Q8IYD8
S-phase kinase-associated protein 2	SKP2	Q13309
Prolactin receptor	PRL	P16471
Actin, cytoplasmic 1	ACTB	P60709
MutS protein homolog 5	MSH5	O43196
Methionine synthase reductase	MTRR	Q9UBK8
Thyroglobulin	TG	P01266
Kit ligand	KITLG	P21583
DNA helicase MCM8	MCM8	Q9UJA3
Alpha-actinin-4	ACTN4	O43707
Sal-like protein 4	SALL4	Q9UJQ4
Transforming growth factor beta receptor type 3	TGFBR3	Q03167
Galactose-1-phosphate uridylyltransferase	GALT	P07902
Fanconi anemia group A protein	FANCA	O15360
follistatin	FST	P19883
Forkhead box protein E1	FOXE1	O00358
Neuroendocrine convertase 1	PCSK1	P29120
Thyrotropin subunit beta	TSHB	P01222
Inhibin beta B chain	INHBB	P09529
Exonuclease 1	EXO1	Q9UQ84
Cohesin subunit SA-3	STAG3	Q9UJ98
Protein Wnt-4	WNT4	P56705
Membrane-associated progesterone receptor component 1	PGRMC1	O00264
Laminin subunit gamma-1	LAMC1	P11047
Forkhead box protein O4	FOXO4	P98177
Peroxisomal multifunctional enzyme type 2	HSD17B4	P51659
Protein-L-isoaspartate(D-aspartate) O-methyltransferase	PCMT1	P22061
Synaptonemal complex central element protein 1	SYCE1	Q8N0S2
Probable ATP-dependent DNA helicase HFM1	HFM1	A2PYH4
Methanethiol oxidase	SELENBP1	Q13228
Cbp/p300-interacting transactivator 2	CITED2	Q99967
Activin receptor type-2B	ACVR2B	Q13705
Meiotic recombination protein DMC1/LIM15 homolog	DMC1	Q14565
2-oxoisovalerate dehydrogenase subunit beta, mitochondrial	BCKDHB	P21953
Probable leucine--tRNA ligase, mitochondrial	LARS2	Q15031
MutS protein homolog 4	MSH4	O15457
LIM/homeobox protein Lhx8	LHX8	Q68G74
Helicase POLQ-like	HELQ	8TDG4
G-protein coupled receptor 3	GPR3	P46089
Long-chain-fatty-acid--CoA ligase 6	ACSL6	Q9UKU0
Nanos homolog 3	NANOS3	P60323
Meiotic recombination protein SPO11	SPO11	Q9Y5K1
A disintegrin and metalloproteinase with thrombospondin motifs 16	ADAMTS16	Q8TE57
NACHT, LRR and PYD domains-containing protein 5	NLRP5	P59047
Dachshund homolog 2	DACH2	Q96NX9
A disintegrin and metalloproteinase with thrombospondin motifs 19	ADAMTS19	Q8TE59
Polyadenylate-binding protein 5	PABPC5	Q96DU9
Bone morphogenetic protein 15	BMP15	O95972
Protein POF1B	POF1B	Q8WVV4
Forkhead box protein L2	FOXL2	P58012
Lutropin-choriogonadotropic hormone receptor	LHR	P22888
Follicle-stimulating hormone receptor	FSHR	P23945
Inhibin alpha chain	INHA	P05111
Protein diaphanous homolog 2	DIAPH2	O60879
Factor in the germline alpha	FIGLA	Q6QHK4
Homeobox protein NOBOX	NOBOX	O60393
DNA helicase MCM9	MCM9	Q9NXL9
Translation initiation factor eIF-2B subunit beta	EIF2B2	P49770
Catechol O-methyltransferase	COMT	P21964
Canalicular multispecific organic anion transporter 2	ABCC3	O15438
Multidrug resistance-associated protein 4	ABCC4	O15439
Multidrug resistance-associated protein 1	ABCC1	P33527
Sodium/bile acid cotransporter	SLC10A1	Q14973
Solute carrier family 22 member 10	SLC22A10	Q63ZE4
Solute carrier family 22 member 6	SLC22A6	Q4U2R8
Organic solute transporter subunit alpha	SLC51A	Q86UW1
Organic solute transporter subunit beta	SLC51B	Q86UW2
Canalicular multispecific organic anion transporter 1	ABCC2	Q92887
Solute carrier organic anion transporter family member 4A1	SLCO4A1	Q96BD0
ATP-binding cassette sub-family C member 11	ABCC11	Q96J66
Solute carrier organic anion transporter family member 3A1	SLCO3A1	Q9UIG8
Nuclear receptor subfamily 1 group I member 2	NR1I2	O75469
Sex hormone-binding globulin	SHBG	P04278
Estrogen receptor beta	ESR2	Q92731
Cytochrome P450 1A2	CYP1A2	P05177
UDP-glucuronosyltransferase 1-1	UGT1A1	P22309
Serum albumin	ALB	P02768
Fatty acid-binding protein, intestinal	FABP2	P12104
Cytochrome P450 3A4	CYP3A4	P08684
Cytochrome P450 3A5	CYP3A5	P20815
Cytochrome P450 3A7	CYP3A7	P24462
Solute carrier family 22 member 2	SLC22A2	O15244
Solute carrier family 22 member 1	SLC22A1	O15245
Solute carrier family 22 member 3	SLC22A3	O75751
Solute carrier organic anion transporter family member 2B1	SLCO2B1	O94956
Solute carrier organic anion transporter family member 1A2	SLCO1A2	P46721
Multidrug resistance-associated protein 7	ABCC10	Q5T3U5
Solute carrier family 22 member 11	SLC22A11	Q9NSA0
ATP-binding cassette sub-family G member 2	ABCG2	Q9UNQ0
Solute carrier organic anion transporter family member 1B1	SLCO1B1	Q9Y6L6
Multidrug resistance protein 1	ABCB1	P08183
Cytochrome P450 1A1	CYP1A1	P04798
Cytochrome P450 1B1	CYP1B1	Q16678
Cytochrome P450 2C19	CYP2C19	P33261
Cytochrome P450 2C8	CYP2C8	P10632
Cytochrome P450 2C9	CYP2C9	P11712
Solute carrier family 22 member 8	SLC22A8	Q8TCC7
Solute carrier organic anion transporter family member 1B3	SLCO1B3	Q9NPD5
Solute carrier organic anion transporter family member 1C1	SLCO1C1	Q9NYB5
Neuronal acetylcholine receptor subunit alpha-4	CHRNA4	P43681
Nuclear receptor coactivator 2	NCOA2	Q15596
G-protein coupled estrogen receptor 1	GPER1	Q99527
ATP synthase subunit a	MT-ATP6	P00846
Beclin-1	BECN1	Q14457
Estradiol 17-beta-dehydrogenase 2	HSD17B2	P37059
Estrogen-related receptor gamma	ESRRG	P62508

## Sheet: Table S4
Table S4 candidate targets of Epimedium
Protein Name	Gene symbol	Uniplot
Estrogen receptor	ESR1	P03372
Androgen receptor	AR	P10275
Estrogen receptor beta	ESR2	Q92731
Vascular endothelial growth factor receptor 2	KDR	P35968
Aromatase	CYP19A1	P11511
Estrogen-related receptor gamma	ESRRG	P62508

## Sheet: Table S5
Table S5 Gene Ontology (GO) Biological Process analysis (p < 0.01)
GO Term	p value	description_Epimedium-POF-BP	Genes
GO:0006355	0.00149503	regulation of transcription, DNA-templated	Q9NPJ4, P10275, Q9UBK2, P03372, Q92731, Q04724, Q8TDD1, Q15596, Q99801, P62508, Q15788, P51843, Q9Y6Q9
GO:0006351	0.000496883	transcription, DNA-templated	Q9NPJ4, P24385, Q9Y618, Q8TDD1, Q15596, Q99801, P62508, Q15788, Q9Y6Q9, P10275, P03372, Q92731, Q04724, Q15759, P48552, P51843
GO:0008284	0.000487902	positive regulation of cell proliferation	P49767, P10275, P08069, P09038, P35968, O43915, P15692, Q99801
GO:0007165	0.000143564	signal transduction	P49767, P12931, O14786, P09038, P08069, P10275, P07900, P03372, Q92731, P42338, Q04724, Q15759, P31749
GO:0042493	3.47944e-05	response to drug	P49767, Q9UBK2, P24385, P07900, P05412, P12931, P18405, P01100
GO:0055114	1.25866e-06	oxidation-reduction process	O14756, P14060, P37059, P26439, P56937, P29474, P11511, P05093, P18405, P37058, P08684, P14061
GO:0000122	1.19935e-06	negative regulation of transcription from RNA poly	Q15466, P24385, P03372, Q9Y618, Q92731, Q04724, O75376, Q15596, P55317, P48552, P15692, P51843, Q15648
GO:0010628	1.12505e-06	positive regulation of gene expression	Q15466, P10275, P42338, Q04724, Q15759, P15692, Q99801, Q15648, Q9Y6Q9
GO:0006367	3.59503e-07	transcription initiation from RNA polymerase II pr	Q15466, P10275, Q9UBK2, P03372, Q92731, P62508, P51843, Q15648
GO:0001525	3.32459e-07	angiogenesis	P49767, P05412, P35968, P29474, P42336, O43915, P15692, O14786, Q15648
GO:0045944	1.23994e-07	positive regulation of transcription from RNA poly	Q9UBK2, Q15596, Q99801, P62508, Q15788, Q9Y6Q9, P10275, P09038, P05412, P03372, P55317, P15692, P48552, P01100, P31749, Q15648
GO:0045893	2.99634e-09	positive regulation of transcription, DNA-template	Q9UBK2, P12931, Q99801, P62508, Q15788, Q9Y6Q9, P10275, P09038, P03372, P05412, Q92731, P48552, P01100, Q15648
GO:0001938	1.45208e-09	positive regulation of endothelial cell proliferat	P49767, P09038, P05412, P35968, O43915, P15692, O14786, P31749
GO:0006694	4.93209e-12	steroid biosynthetic process	P14060, P37059, P26439, P11511, P05093, P18405, P51843, P14061
GO:0048010	1.22366e-14	vascular endothelial growth factor receptor signal	P49767, P07900, P35968, P12931, P42338, P42336, Q15759, O43915, P15692, P46108, O14786

## Sheet: Table S6
Table S6 Gene Ontology (GO) Cellular Component analysis (p < 0.01)
GO Term	p value	description_Epimedium-POF-CC	Genes
GO:0005783	0.0078948	endoplasmic reticulum	O14756, P35968, P26439, P56937, P11511, P05093, P01100, P37058
GO:0005789	0.00253459	endoplasmic reticulum membrane	P14060, P37059, P26439, P56937, P11511, P05093, P18405, P37058, P08684
GO:0016020	0.000217632	membrane	P49767, P24385, Q9Y618, O75376, Q8TDD1, P30825, O14786, P08069, P03372, P07900, P33151, P11511, P15692, O43915, P01100, Q15648, P51843
GO:0005634	1.44848e-05	nucleus	P24385, P12931, O75376, Q15596, P62508, Q9Y6Q9, P10275, P09038, P07900, Q04724, P29474, P07288, P55317, P01100, P46108, Q15466, Q9NPJ4, Q9UBK2, Q9Y618, Q8TDD1, Q99801, Q15788, P05412, P03372, P35968, Q92731, P42338, P48552, P51843, P31749, Q15648
GO:0005654	7.36552e-06	nucleoplasm	Q15466, Q9UBK2, P24385, Q9Y618, O75376, Q15596, P62508, Q15788, Q9Y6Q9, P10275, P05412, P03372, P07900, Q92731, Q04724, Q15759, P48552, P01100, P51843, P31749, Q15648, P14061

## Sheet: Table S7
Table S7 Gene Ontology (GO) Molecular Function analysis (p < 0.01)
GO Term	p value	description_Epimedium-POF-MF	Genes
GO:0005515	0.000844789	protein binding	P24385, P49767, P12931, O75376, Q15596, P62508, O14786, Q9Y6Q9, P10275, P09038, P07900, P33151, Q04724, P29474, P07288, Q15759, P01100, P46108, Q15466, Q9NPJ4, Q9UBK2, Q9Y618, P30825, Q99801, Q15788, P08069, P05412, P03372, P35968, O15393, Q92731, P42338, P42336, O43915, P48552, P15692, P51843, P31749, Q15648
GO:0003682	0.000163007	chromatin binding	P10275, P05412, P03372, Q9Y618, Q15596, P01100, Q15788, Q15648
GO:0043565	2.17084e-05	sequence-specific DNA binding	P10275, Q9UBK2, P05412, P03372, Q92731, P55317, Q99801, P01100, P62508, P51843
GO:0003713	9.0558e-06	transcription coactivator activity	Q9UBK2, P05412, Q92731, Q15596, P48552, Q15788, Q15648, Q9Y6Q9
GO:0019899	5.95723e-07	enzyme binding	P10275, P24385, P05412, P03372, P12931, Q92731, P46108, P08684, Q15788, P31749
GO:0008134	1.76933e-12	transcription factor binding	Q15466, P10275, Q9UBK2, P24385, P05412, P03372, Q9Y618, Q04724, Q15596, P55317, Q99801, P01100, P51843, Q15648

## Sheet: Table S8
Table S8 Kyoto Encyclopedia of Genes and Genomes (KEGG) Pathway analysis (p < 0.01)
Term	p value	description_Epimedium-POF-KEGG	Genes
hsa04014	7.40812e-05	Ras signaling pathway	P49767, P08069, P09038, P35968, P42338, P42336, O43915, P15692, P31749
hsa04151	7.108e-06	PI3K-Akt signaling pathway	P49767, P08069, P09038, P24385, P07900, P35968, P42338, P29474, P42336, O43915, P15692, P31749
hsa05205	3.46696e-07	Proteoglycans in cancer	P08069, P09038, P24385, P03372, P35968, P12931, P42338, P42336, Q15759, P15692, P31749
hsa04370	8.71346e-08	VEGF signaling pathway	P35968, P12931, P42338, P29474, P42336, Q15759, P15692, P31749
hsa05215	6.11147e-08	Prostate cancer	P10275, P08069, P24385, P07900, P42338, P42336, P07288, Q99801, P31749
hsa04015	5.00081e-08	Rap1 signaling pathway	P49767, P08069, P09038, P35968, P12931, P42338, P42336, Q15759, O43915, P15692, P46108, P31749
hsa04510	4.09891e-08	Focal adhesion	P49767, P08069, P24385, P05412, P35968, P12931, P42338, P42336, O43915, P15692, P46108, P31749
hsa04913	1.81548e-08	Ovarian steroidogenesis	P14060, P37059, P08069, P26439, P56937, P11511, P05093, P14061
hsa04915	8.24401e-09	Estrogen signaling pathway	P07900, P05412, P03372, P12931, Q92731, P42338, P29474, P42336, P01100, P31749
hsa05200	8.14161e-09	Pathways in cancer	P49767, P24385, Q99801, P10275, P09038, P08069, P07900, P05412, P42338, P42336, P07288, O43915, P15692, P01100, P46108, P31749
hsa04919	1.55451e-09	Thyroid hormone signaling pathway	P24385, P03372, P12931, P42338, O75376, P42336, Q15596, Q15788, Q15648, P31749, Q9Y6Q9
hsa04917	4.03483e-10	Prolactin signaling pathway	P24385, P03372, P12931, Q92731, P42338, P42336, Q15759, P05093, P01100, P31749
hsa00140	1.53526e-12	Steroid hormone biosynthesis	O14756, P14060, P37059, P26439, P56937, P11511, P05093, P18405, P37058, P08684, P14061
